# Supplementary material for: Ni3[Fe(CN)6]2 nanocubes boost the catalytic activity of Pt for electrochemical hydrogen evolution
Source: Royal Society of Chemistry journal article supplement (doi:10.1039/c8qi00134k), 2018-01-01
Supplement: c8qi00134k1.pdf [file c8qi00134k1.pdf]

**Supplementary Information**

**Ni<sub>3</sub>[Fe(CN)<sub>6</sub>]<sub>2</sub> nanocubes boost the catalytic activity of Pt towards  
electrochemical hydrogen evolution**

Xiao Zhang,<sup>a</sup> Pei Liu,<sup>a</sup> Yanfang Sun,<sup>b</sup> Tianrong Zhan,<sup>a</sup> Qingyun Liu,<sup>c</sup> Lin Tang,<sup>a</sup> Jinxue Guo<sup>a,\*</sup> and  
Yongyao Xia<sup>d</sup>

<sup>a</sup> *State Key Laboratory Base of Eco-chemical Engineering, College of Chemistry and Molecular  
Engineering, Qingdao University of Science and Technology, Qingdao 266042, PR China*

<sup>b</sup> *College of Science and Technology, Agricultural University of Hebei, Cangzhou 061100, China*

<sup>c</sup> *College of Chemical and Environmental Engineering, Shandong University of Science and  
Technology, Qingdao 266510, China*

<sup>d</sup> *Department of Chemistry and Shanghai Key Laboratory of Molecular Catalysis and Innovative  
Materials, Institute of New Energy, iChEM(Collaborative Innovation Center of Chemistry for Energy  
Materials), Fudan University, Shanghai 200433, China*

**\*Corresponding author. E-mail: gjx1213@126.com (J. Guo)**

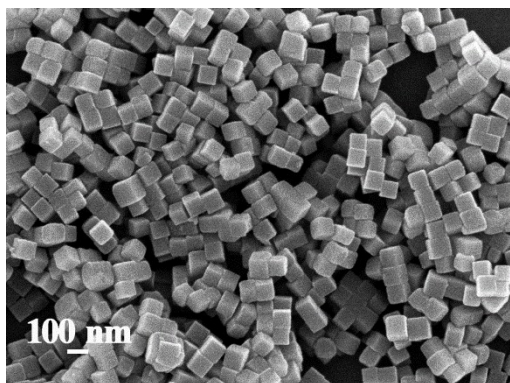

**Fig. S1** SEM image of  $\text{Ni}_3[\text{Fe}(\text{CN})_6]_2$  nanocubes.

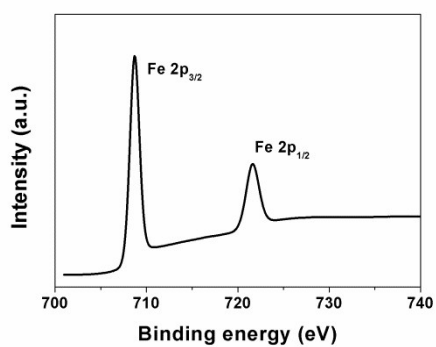

**Fig. S2** The Fe 2p XPS spectrum of  $\text{Ni}_3[\text{Fe}(\text{CN})_6]_2/\text{Pt}$ . The Fe 2p<sub>3/2</sub> peak at 708.7 eV and Fe 2p<sub>1/2</sub> peak at 721.6 eV show that, most of Fe content is oxidation state of Fe (II) or Fe (III).<sup>1,2</sup>

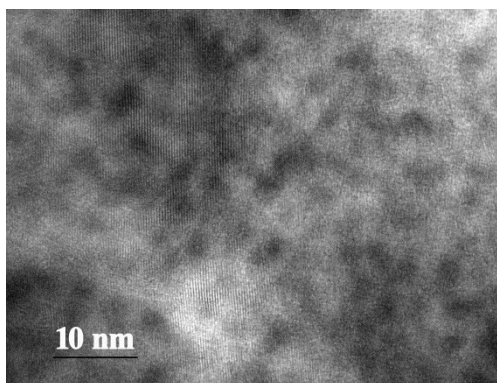

**Fig. S3** TEM image of  $\text{Ni}_3[\text{Fe}(\text{CN})_6]_2/\text{Pt}$  catalyst after durability experiment in  $\text{H}_2\text{SO}_4$ .

## References

1. Y. Ji, Y. Wu, G. Zhao, D. Wang, L. Liu, W. He and Y. Li, *Nano Res.*, 2015, **8**, 2706-2713.
2. Q. Wang, S. Chen, F. Shi, Y. Nie, Y. Wang, R. Wu, J. Li, Y. Zhang, W. Ding, Y. Li, L. Li and Z. Wei, *Adv. Mater.*, 2016, **28**, 10673-10678.
